# Supplementary material for: Microfluidic devices for culturing primary mammalian neurons at low densities
Source: Royal Society of Chemistry journal article supplement (doi:10.1039/b705266a), 2007-01-01
Supplement: b705266a.pdf [file b705266a.pdf]

|                        | Rhodium<br>mg/kg | Palladium<br>mg/kg | Platinum<br>mg/kg | Total neurons<br>/PDMS type |
|------------------------|------------------|--------------------|-------------------|-----------------------------|
| PDMS Extracted         | < 0.02           | < 0.4              | 1.5               | 139                         |
| PDMS (Aut.) Autoclaved | < 0.02           | < 0.4              | 4.8               | 57                          |
| PDMS Native            | < 0.02           | < 0.4              | 5.1               | 1                           |

**Table S1** Metals content in PDMS samples was determined by Inductively Coupled Plasma-Mass Spectrometry (ICP-MS). Yttrium and bismuth were used as internal standards. Extracting PDMS with solvents that reduce platinum levels significantly improves biocompatibility. Closed-channel devices fabricated of extracted PDMS, which removes low molecular weight, uncross-linked fractions, solvents and residues of the platinum catalyst, show increased neuronal numbers with enhanced survival to  $\geq 7$  days.

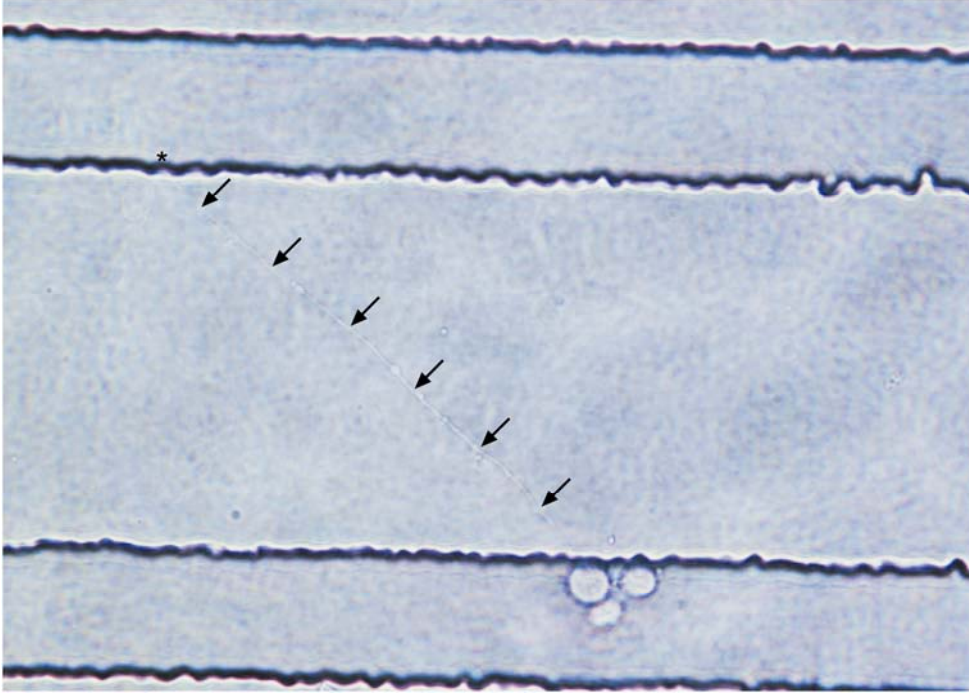

**Fig. S1** Top view of a neuron in an open-channel PDMS device with its axonal process (arrows) emerging out of the channel, crossing the PDMS surface between channels where it entered the adjacent channel (asterisk).
